# Supplementary material for: Efficient Screening of CRISPR/Cas9-Induced Events in Drosophila Using a Co-CRISPR Strategy
Source: Oxford University Press journal article supplement (doi:10.1534/g3.116.036723), 2017-01-01
Supplement: 036723_figures1.pdf [file 036723_figures1.pdf]

**Figure S1: Sequence of HDR dsDNA repair template for *lbk* knock-in.**

5' – CAGACGGACTTGGAGGCCAGCAGGATCATTGTCCAGCAAGGACTCGGGCACCGGTTGGA  
TGCGGCTGTGAAACGCACTCTGGATGACTTTGAGGTGGCCATGCCAGTCATAAGCATCACACCG  
ACGACGAGGAGGAGGAGGAGGTTGAGGAGGTGTATGAAGAAAACGAGCCACCATACATAAAGCAT  
ACATACGAAGTGAATTATGCTGAACCCGAGCAGCATCTCTTTCTGCAGAACAACAATCACAAC  
CGACGGTGGCGGGATTGGCGTTGCTGGTGGGGTCAACAAAATGGTGCCCAACGCGCTGCTCCGCA  
AATGCAGCGCTGGTGCCAGCGGCAGCAACTACAGCTCCATCCAACAGTGCACAACAGTGGACATT  
ATGGACTACAAAGACCATGACGGTGATTATAAAGATCATGACATCGATTACAAGGATGACGATGA  
CAAGCACCGGTTGAGCTCCGCCACCATGGATCTCCACCGGGTGGAGGCCGCATCTTTTACCCAT  
ACGATGTTCTGACTATGCGGGCTATCCCTATGACGTCCCGGACTATGCAGGATCCTATCCATAT  
GACGTTCCAGATTACGCTGCTCATGGCGGATGAGCCATCACTTAACCAAATGAGCAGGATGATCA  
GGATCATATAACAAAACTGGAGGCTGCACCGTAACCCCAACCGCAGTCCGCCCCAAAACGAAC  
ACAAAGACTGTTTAACTCGTAATTATAATTCGTAGATGGTGGCCCAGACTTTTGGACTGGCCACG  
ACCATAGAGCAGGCGGCCTTATTGATGCCTTTGCTATGGAAATAGGACAGCTAGAGAAACATACC  
AGTGTCTTCGTAATTTATGAAATTAATCGTTAGAATCGATTATCATTAACTTGTAATGCATAATA  
TTTAATTATCGTATATGTATATTTATAATTTCTTTTCGCTTGTGATATTATTTATTATTTGATT  
GCCCGAGTTTTAGACGTAATACATTCA

The repair template consists of a 225 bp 3xFLAG-3X-HA flanked by 387 and 384 bp *lbk* homology arms (Fig. 1). This repair template was synthesized as a gene block (gB) by Integrated DNA Technologies, Inc., PCR amplified, and cloned into TOPO<sup>®</sup> vector. The gRNA-*lbk2* genomic target is underlined. The 3xFLAG-3xHA epitope tag is blue, the stop codon is red, followed by mutations at the PAM site of two GG changed to CA shown in green text.
