# Supplementary material for: Efficient Screening of CRISPR/Cas9-Induced Events in Drosophila Using a Co-CRISPR Strategy
Source: Oxford University Press journal article supplement (doi:10.1534/g3.116.036723), 2017-01-01
Supplement: 036723_figures2.pdf [file 036723_figures2.pdf]

**Figure S2: CRISPR-induced mutations in *lbk*.**

**A**

```

Wild type ~ACTGGGGGATCCC-----TGAG---TG-----CTCTACTCAAATCCGGTGGCG
lbk70.1 ~ACTGGGGGATCCCCC-----TGAG---TG-----CTCTACTCAAATCCGGTGGCG
lbk70.2 ~ACTGGGGGATCCCCC-----TGAG---TG-----CTCTACTCAAATCCGGTGGCG
lbk70.3 ~ACTGGGGGATCCCCC-----TGAG---TG-----CTCTACTCAAATCCGGTGGCG
lbk70.4 ~ACTGGGGGATCCCCC-----TGAG---TG-----CTCTACTCAAATCCGGTGGCG
lbk70.5 ~ACTGGGGGATCCCCC-----AG---TA-----CTCTACTCAAATCCGGTGGCG [1]
lbk73.1 ~ACTGGGGGATCCCCC-----T-AG---TG-----CTCTACTCAAATCCGGTGGCG [-1]
lbk73.2 ~ACTGGGGGATCCCCC-----T-AG---TG-----CTCTACTCAAATCCGGTGGCG [-1]
lbk73.3 ~ACTGGGGGATCCCCC-----TGAG---TG-----CTCTACTCAAATCCGGTGGCG
lbk73.5 ~ACTGGGGGATCCCCC-----T-AG---TG-----CTCTACTCAAATCCGGTGGCG [-1]
lbk73.7 ~ACTGGGGGATCCCCC-----T-AG---TG-----CTCTACTCAAATCCGGTGGCG [-1]
lbk73.8 ~ACTGGGGGATCCCCC-----T-AG---TG-----CTCTACTCAAATCCGGTGGCG [-1]
lbk75.5 ~ACTGGGGGATCCCCC-----CCAG---TG-----CTCTACTCAAATCCGGTGGCG [2]
lbk96.1 ~ACTGGGGGATCCCCC-----TGAG---TG-----CTCTACTCAAATCCGGTGGCG
lbk96.4 ~ACTGGGGGATCCCCC-----TGAG---TG-----CTCTACTCAAATCCGGTGGCG
lbk97.1 ~ACTGGGGGATCCCCC-----TGAG---TG-----CTCTACTCAAATCCGGTGGCG
lbk97.2 ~ACTGGGGGATCCC-----AG---TG-----CTCTACTCAAATCCGGTGGCG [-5]
lbk100.2 ~ACTGGGGGATC-----TACTC-----AATCCGGTGGCG [-15]
lbk100.3 ~ACTGGGGGATC-----TACTC-----AATCCGGTGGCG [-15]
lbk107.1 ~ACTGGGGGATCCCCC-----G---TG-----CTCTACTCAAATCCGGTGGCG [-3]
lbk107.2 ~ACTGGGGGATCCCCC-----AG---TG-----CTCTACTCAAATCCGGTGGCG [-2]
lbk107.3 ~ACTGGGGGATCCCCC CAGTGCTC TGAG---TG-----CTCTACTCAAATCCGGTGGCG [+8]
lbk107.4 ~ACTGGGGGATCCCCC-----TGAG---TG-----CTCTACTCAAATCCGGTGGCG
lbk107.8 ~ACTGGGGGATCCCCC-----G---TG-----CTCTACTCAAATCCGGTGGCG [-3]
lbk107.9 ~ACTGGGGGATCCCCC-----TGAG---TG-----CTCTACTCAAATCCGGTGGCG
lbk122.1 ~ACTGGGGGATCCCCC-----TGAG---TG-----CTCTACTCAAATCCGGTGGCG
lbk122.2 ~ACTGGGGGATCCCCC-----T-AG---TG-----CTCTACTCAAATCCGGTGGCG [-1]
lbk122.3 ~ACTGGGGGATCCCCC-----TGAG---TG-----CTCTACTCAAATCCGGTGGCG
lbk122.4 ~ACTGGGGGATCCCCC-----TGAG---TG-----CTCTACTCAAATCCGGTGGCG
lbk122.5 ~ACTGGGGGATCCCCC-----T-AG---TG-----CTCTACTCAAATCCGGTGGCG [-1]
lbk122.6 ~ACTGGGGGATCCCCC-----TGAG---TG-----CTCTACTCAAATCCGGTGGCG
lbk125.1* ~ACTGGGGGATCCCCC-----TGAG---TG-----CTCTACTCAAATCCGGTGGCG
lbk125.2* ~ACTGGGGGATCCCCC-----TGAG---TG-----CTCTACTCAAATCCGGTGGCG
lbk125.3 ~ACTGGGGGATCCCCC-----TGAG---TG-----CTCTACTCAAATCCGGTGGCG
lbk125.4* ~ACTGGGGGATCCCCC-----TGAG---TG-----CTCTACTCAAATCCGGTGGCG
lbk125.6 ~ACTGGGGGATCCCCC-----TGAG---TG-----CTCTACTCAAATCCGGTGGCG
lbk130.1 ~ACTGGGGGATCCCCC-----AG---TG CTCTACTCTACTCAAATCCGGTGGCG [-2, +5]
lbk130.2 ~ACTGGGGGATCCCCC-----AGTGCTCTA-----CTCTACTCAAATCCGGTGGCG [3, +3]
lbk130.3 ~ACTGGGGGATCCCCC-----AGTGCTCTA-----CTCTACTCAAATCCGGTGGCG [3, +3]
lbk130.4 ~ACTGGGGGATCCCCC-----AGTGCTCTA-----CTCTACTCAAATCCGGTGGCG [3, +3]
lbk130.5 ~ACTGGGGGATCCCCC-----AGTGCTCTA-----CTCTACTCAAATCCGGTGGCG [3, +3]
lbk130.6 ~ACTGGGGGATCCCCC-----AGTGCTCTA-----CTCTACTCAAATCCGGTGGCG [3, +3]
lbk152.2 ~ACTGGGGGATCCCCC-----TGAG---TG-----CTCTACTCAAATCCGGTGGCG

```

**B**

Wild type ~CAACAGTGCACAACAGTGGACATT**TGA**-G---CGGT--**GG**--CTTA-ACCAAA  
lbk70.1 ~CAACAGTGCACAACAGTGGACATTTG**A**---ATGGT--GG--CTTA-ACCAAA [+2,1]  
lbk70.2 ~CAACAGTGCACAACAGTGGACATTTG**A**---ATGGT--GG--CTTA-ACCAAA [+2,1]  
lbk70.4 ~CAACAGTGCACAACAGTGGACATTTG**A**---ATGGT--GG--CTTA-ACCAAA [+2,1]  
lbk70.5 ~CAACAGTGCACAACAGTGGACATTTG**A**---**---**T--GG--CTTA-ACCAAA [-4]  
lbk73.1 ~CAACAGTGCACAACAGTGGACATTTGA-G---CGGT--GG--CTTA-ACCAAA  
lbk73.2 ~CAACAGTGCACAACAGTGGACATTTGA-G---CGGT--GG--CTTA-ACCAAA  
lbk73.3 ~CAACAGTGCACAACAGTGGACATTTGA-G---CGGT--GG--CTTA-ACCAAA  
lbk73.5 ~CAACAGTGCACAACAGTGGACATTTGA-G---CGGT--GG--CTTA-ACCAAA  
lbk73.7 ~CAACAGTGCACAACAGTGGACATTTGA-G---CGGT--GG--CTTA-ACCAAA  
lbk73.8 ~CAACAGTGCACAACAGTGGACATTTGA-G---CGGT--GG--CTTA-ACCAAA  
lbk75.5 ~CAACAGTGCACAACAGTGGACAT**---****---**CGGT--GG--CTTA-ACCAAA [-5]  
lbk96.1 ~CAACAGTGCACAACAGTGGACATTTGA-G---CGGT--GG--CTTA-ACCAAA  
lbk96.4 ~CAACAGTGCACAACAGTGGACATTTGA-G---CGGT--GG--CTTA-ACCAAA  
lbk97.1 ~CAACAGTGCACAACAGTGGACATTTGA-G**TGGT**GGT--GG--CTTA-ACCAAA [+4]  
lbk97.2 ~CAACAGTGCACAACAGTGGACATTTGA-G**TGGT**GGT--GG--CTTA-ACCAAA [+4]  
lbk100.2 ~CAACAGTGCACAACAGTGGACATTTGA-G---**---**GT--GG--CTTA-ACCAAA [-2,1]  
lbk100.3 ~CAACAGTGCACAACAGTGGACATTTGA-G---**---**GT--GG--CTTA-**---**CCAAA  
lbk107.1 ~CAACAGTGCACAACAGTGGACATTTGA-**---**CGGT--GG--CTTA-ACCAAA [-1]  
lbk107.2 ~CAACAGTGCACAACAGTGGACATTT**---**CGGT--GG--CTTA-ACCAAA [-3]  
lbk107.3 ~CAACAGTGCACAACAGTGGACATTT**---**CGGT--GG--CTTA-ACCAAA [-3]  
lbk107.4 ~CAACAGTGCACAACAGTGGACATTT**---**CGGT--GG--CTTA-ACCAAA [-3]  
lbk107.8 ~CAACAGTGCACAACAGTGGACATTTGA-**---**CGGT--GG--CTTA-ACCAAA [-1]  
lbk107.9 ~CAACAGTGCACAACAGTGGACATTT**---**CGGT--GG--CTTA-ACCAAA [-3]  
lbk122.1 ~CAACAGTGCACAACAGTGGACATTTGA-G---CGGT--GG--CTTA-CCCAAA  
lbk122.2 ~CAACAGTGCACAACAGTGGACA**---**A**---**GGT--GG--CTTA-ACCAAA [-4,2]  
lbk122.3 ~CAACAGTGCACAACAGTGGACA**---**A**---**GGT--GG--CTTA-ACCAAA [-4,2]  
lbk122.4 ~CAACAGTGCACAACAGTGGGA**---**A**---**CA**---**CGGT--GG--CTTA-ACCAAA [-4,2]  
lbk122.5 ~CAACAGTGCACAACAGTGGACATTTGA-G---**---**G**---**CA**---**GG**---**CA**---**TA**---**ACCAAA [-1,+5,1]  
lbk122.6 ~CAACAGTGCACAACAGTGGACA**---**A**---**GGT--GG--CTTA-ACCAAA [-4,2]  
lbk125.1\* ~CAACAGTGCACAACAGTGGACATTT**---**CGGT--GG--CTTA-ACCAAA [-3]  
lbk125.2\* ~CAACAGTGCACAACAGTGGACATTT**---**CGGT--GG--CTTA-ACCAAA [-3]  
lbk125.3 ~CAACAGTGCACAACAGTGGACATTT**---**CGGT--GG--CTTA-ACCAAA [-3]  
lbk125.4\* ~CAACAGTGCACAACAGTGGACATTT**---**CGGT--GG--CTTA-ACCAAA [-3]  
lbk125.6 ~CAACAGTGCACAACAGTGGACATTT**---**CGGT--GG--CTTA-ACCAAA [-3]  
lbk130.1 ~CAACAGTGCACAACAGTGGACATTTGA-**---**GGT--GG--CTTA-ACCAAA [-1,1]  
lbk130.2 ~CAACAGTGCACAACAGTGGACATTTGA-G---CGGT--GG--CTTA-ACCAAA  
lbk130.3 ~CAACAGTGCACAACAGTGGACATTTGA-**---**CGGT--GG--CTTA-ACCAAA [-1]  
lbk130.4 ~CAACAGTGCACAACAGTGGACATTTGA-G---CGGT--GG--CTTA-ACCAAA  
lbk130.5 ~CAACAGTGCACAACAGTGGACATTTGA-**---**CGGT--GG--CTTA-ACCAAA [-1]  
lbk130.6 ~CAACAGTGCACAACAGTGGACATTTGA-G---CGGT--GG--CTTA-ACCAAA

# C

wild type ~ACTGGGGGATCCC-TCGAGTGTCTACTCAAATCCGGTGGCG  
lbk63.1 ~ACTGGGGGATCCCCC-TCGAGTGTCTACTCAAATCCGGTGGCG [-1]  
lbk63.2 ~ACTGGGGGATCCCCC-TCGAGTGTCTACTCAAATCCGGTGGCG  
lbk63.3 ~ACTGGGGGATCCCCC-TCGAGTGTCTACTCAAATCCGGTGGCG [-3]  
lbk63.4 ~ACTGGGGGATCCCCC-TCGAGTGTCTACTCAAATCCGGTGGCG  
lbk63.5 ~ACTGGGGGATCCCCC-TCGAGTGTCTACTCAAATCCGGTGGCG  
lbk63.6 ~-----T-----TCGAGTGTCTACTCAAATCCGGTGGCG [-42]  
lbk63.7 ~-----T-----TCGAGTGTCTACTCAAATCCGGTGGCG [-42]  
lbk81.3 ~ACTGGGGGATCCCCC-TCGAGTGTCTACTCAAATCCGGTGGCG  
lbk82.1\* ~ACTGGGGGATCCCCC-TCGAGTGTCTACTCAAATCCGGTGGCG  
lbk82.3\* ~ACTGGGGGATCCCCC-TCGAGTGTCTACTCAAATCCGGTGGCG  
lbk88.1 ~ACTGGGGGATCCCCC-TCGAGTGTCTACTCAAATCCGGTGGCG  
lbk89.1 ~ACTGGGGGATCCCCC-TCGAGTGTCTACTCAAATCCGGTGGCG  
lbk91.1 ~ACTGGGGGATCCCCC-TCGAGTGTCTACTCAAATCCGGTGGCG  
lbk91.2 ~ACTGGGGGATCCCCC-TCGAGTGTCTACTCAAATCCGGTGGCG [-2]  
lbk91.3 ~ACTGGGGGATCCCCC-TCGAGTGTCTACTCAAATCCGGTGGCG  
lbk91.4 ~ACTGGGGGATCCCCC-TCGAGTGTCTACTCAAATCCGGTGGCG  
lbk119.1 ~ACTGGGGGATCCCCC-TCGAGTGTCTACTCAAATCCGGTGGCG  
lbk119.4 ~ACTGGGGGATCCCCC-TCGAGTGTCTACTCAAATCCGGTGGCG  
lbk119.5 ~ACTGGGGGATCCCCC-TCGAGTGTCTACTCAAATCCGGTGGCG  
lbk128.1 ~ACTGGGGGATCCCCC-TCGAGTGTCTACTCAAATCCGGTGGCG [-2]  
lbk128.2 ~ACTGGGGGATCCCCC-TCGAGTGTCTACTCAAATCCGGTGGCG  
lbk128.3 ~ACTGGGGGATCCCCC-TCGAGTGTCTACTCAAATCCGGTGGCG  
lbk129.2 ~ACTGGGGGATCCCCC-TCGAGTGTCTACTCAAATCCGGTGGCG [-1,1]  
lbk129.3 ~ACTGGGGGATCCCCC-TCGAGTGTCTACTCAAATCCGGTGGCG  
lbk129.4 ~ACTGGGGGATCCCCC-TCGAGTGTCTACTCAAATCCGGTGGCG  
lbk139.1 ~ACTGGGGGATCCCCC-TCGAGTGTCTACTCAAATCCGGTGGCG [-2]  
lbk139.2 ~ACTGGGGGATCCCCC-TCGAGTGTCTACTCAAATCCGGTGGCG  
lbk139.3 ~ACTGGGGGATCCCCC-TCGAGTGTCTACTCAAATCCGGTGGCG  
lbk139.4 ~ACTGGGGGATCCCCC-TCGAGTGTCTACTCAAATCCGGTGGCG [-3]  
lbk139.5 ~ACTGGGGGATCCCCC-TCGAGTGTCTACTCAAATCCGGTGGCG  
lbk139.6 ~ACTGGGGGATCCCCC-TCGAGTGTCTACTCAAATCCGGTGGCG  
lbk139.7 ~ACTGGGGGATCCCCC-TCGAGTGTCTACTCAAATCCGGTGGCG  
lbk144.1 ~ACTGGGGGATCCCCC-TCGAGTGTCTACTCAAATCCGGTGGCG  
lbk144.2 ~ACTGGGGGATCCCCC-TCGAGTGTCTACTCAAATCCGGTGGCG  
lbk144.4 ~ACTGGGGGATCCCCC-TCGAGTGTCTACTCAAATCCGGTGGCG  
lbk144.5 ~ACTGGGGGATCCCCC-TCGAGTGTCTACTCAAATCCGGTGGCG  
lbk144.6 ~ACTGGGGGATCCCCC-TCGAGTGTCTACTCAAATCCGGTGGCG  
lbk144.9 ~ACTGGGGGATCCCCC-TCGAGTGTCTACTCAAATCCGGTGGCG  
lbk144.10 ~ACTGGGGGATCCCCC-TCGAGTGTCTACTCAAATCCGGTGGCG  
lbk146.1 ~ACTGGGGGATCCCCC-TCGAGTGTCTACTCAAATCCGGTGGCG  
lbk146.2 ~ACTGGGGGATCCCCC-TCGAGTGTCTACTCAAATCCGGTGGCG  
lbk146.3 ~ACTGGGGGATCCCCC-TCGAGTGTCTACTCAAATCCGGTGGCG  
lbk146.4 ~ACTGGGGGATCCCCC-TCGAGTGTCTACTCAAATCCGGTGGCG  
lbk146.5 ~ACTGGGGGATCCCCC-TCGAGTGTCTACTCAAATCCGGTGGCG  
lbk147.1\* ~ACTGGGGGATCCCCC-TCGAGTGTCTACTCAAATCCGGTGGCG  
lbk148.2 ~ACTGGGGGATCCCCC-TCGAGTGTCTACTCAAATCCGGTGGCG  
lbk149.1 ~ACTGGGGGATCCCCC-TCGAGTGTCTACTCAAATCCGGTGGCG [+1]  
lbk149.2 ~ACTGGGGGATCCCCC-TCGAGTGTCTACTCAAATCCGGTGGCG  
lbk149.3 ~ACTGGGGGATCCCCC-TCGAGTGTCTACTCAAATCCGGTGGCG  
lbk150.1 ~ACTGGGGGATCCCCC-TCGAGTGTCTACTCAAATCCGGTGGCG [-2]  
lbk150.2 ~ACTGGGGGATCCCCC-TCGAGTGTCTACTCAAATCCGGTGGCG  
lbk150.4 ~ACTGGGGGATCCCCC-TCGAGTGTCTACTCAAATCCGGTGGCG [-2]  
lbk151.1 ~ACTGGGGGATCCCCC-TCGAGTGTCTACTCAAATCCGGTGGCG  
lbk151.2 ~ACTGGGGGATCCCCC-TCGAGTGTCTACTCAAATCCGGTGGCG

D

wild type ~AACAGTGCACAACAGTGGG--CA--TT--TG--A-G---CGGTGGCTTAACCAA  
lbk63.1 ~AACAGTGCACAACAGTGGG--CA--TT--TG--A-G---GGTGGCTTAACCAA [1]  
lbk63.2 ~AACAGTGCACAACAGTGGG--CA--TT--TG--A-G---CGGTGGCTTAACCAA  
lbk63.3 ~AACAGTGCACAACAGTGGG--CA--TT--TG--A-G---CGGTGGCTTAACCAA  
lbk63.4 ~AACAGTGCACAACAGTGGG--CA--TT--TG--A-G---CGGTGGCTTAACCAA  
lbk63.6 ~AACAGTGCACAACAGTGGG--CA--TT--TG--A-G---CGGTGGCTTAACCAA [-4]  
lbk63.7 ~AACAGTGCACAACAGTGGG--CA--TT--TG--A-G---CGGTGGCTTAACCAA [-4]  
lbk82.1\* ~AACAGTGCACAACAGTGGG--CA--TT--TG--A-G---CGGTGGCTTAACCAA  
lbk82.3\* ~AACAGTGCACAACAGTGGG--CA--TT--TG--A-G---CGGTGGCTTAACCAA  
lbk88.1 ~AACAGTGCACAACAGTGGG--CA--TT--TG--A-G---GGTGGCTTAACCAA [-1]  
lbk89.1 ~AACAGTGCACAACAGTGGG--CA--TT--TG--A-G---CGGTGGCTTAACCAA  
lbk91.1 ~AACAGTGCACAACAGTGGG--CA--TT--TG--A-G---CGGTGGCTTAACCAA [-1]  
lbk91.2 ~AACAGTGCACAACAGTGGG--CA--TT--TG--A-G---GGCTTAACCAA [-7]  
lbk91.3 ~AACAGTGCACAACAGTGGG--CA--TT--TG--A-G---CGGTGGCTTAACCAA [-1]  
lbk91.4 ~AACAGTGCACAACAGTGGG--CA--TT--TG--A-G---CGGTGGCTTAACCAA [-1]  
lbk119.1 ~AACAGTGCACAACAGTGGG--CA--TT--TG--A-G---CGGTGGCTTAACCAA [-5]  
lbk119.4 ~AACAGTGCACAACAGTGGG--CA--TT--TG--A-G---CGGTGGCTTAACCAA [-5]  
lbk119.5 ~AACAGTGCACAACAGTGGG--CA--TT--TG--A-G---CGGTGGCTTAACCAA [-5]  
lbk128.1 ~AACAGTGCACAACAGTGGG--CA--TT--TG--A-G---CGGTGGCTTAACCAA  
lbk128.2 ~AACAGTGCACAACAGTGGG--CA--TT--TG--A-G---GGCTTAACCAA [-7]  
lbk128.3 ~AACAGTGC-----TG--A-G---GGCTTAACCAA [-26]  
lbk129.2 ~AACAGTGCACAACAGTGGG--CA--TT--TG--A-G---CGGTGGCTTAACCAA  
lbk129.3 ~AACAGTGCACAACAGTGGG--CA--TT--TG--A-G---CGGTGGCTTAACCAA  
lbk129.4 ~AACAGTGCACAACAGTGGG--CA--TT--TG--A-G---CGGTGGCTTAACCAA  
lbk139.1 ~AACAGTGCACAACAGTGGG--CA--TT--TG--A-G---GGTGGCTTAACCAA [1]  
lbk139.2 ~AACAGTGCACAACAGTGGG--CA--TT--TG--A-G---GGTGGCTTAACCAA [1]  
lbk139.3 ~AACAGTGCACAACAGTGGG--CA--TT--TG--A-G---CGGTGGCTTAACCAA [-1]  
lbk139.4 ~AACAGTGCACAACAGTGGG--CA--TT--TG--A-G---CGGTGGCTTAACCAA  
lbk139.5 ~AACAGTGCACAACAGTGGG--CA--TT--TG--A-G---CGGTGGCTTAACCAA  
lbk139.6 ~AACAGTGCACAACAGTGGG--CA--TT--TG--A-G---CGGTGGCTTAACCAA [-1]  
lbk139.7 ~AACAGTGCACAACAGTGGG--CA--TT--TG--A-G---CGGTGGCTTAACCAA  
lbk144.1 ~AACAGTGCACAACAGTGGG--CA--TT--TG--A-G---CGGTGGCTTAACCAA  
lbk144.4 ~AACAGTGCACAACAGTGGG--CA--TT--TG--A-G---CGGTGGCTTAACCAA  
lbk144.5 ~AACAGTGCACAACAGTGGG--CA--TT--TG--A-G---CGGTGGCTTAACCAA [-1, 4]  
lbk144.6 ~AACAGTGCACAACAGTGGG--CA--TT--TG--A-G---CGGTGGCTTAACCAA  
lbk144.9 ~AACAGTGCACAACAGTGGG--CA--TT--TG--A-G---GGTGGCTTAACCAA [-3]  
lbk144.10 ~AACAGTGCACAACAGTGGG--CA--TT--TG--A-G---CGGTGGCTTAACCAA  
lbk146.1 ~AACAGTGCACAACAGTGGG--CA--TT--TG--A-G---CGGTGGCTTAACCAA  
lbk146.2 ~AACAGTGCACAACAGTGGG--CA--TT--TG--A-G---CGGTGGCTTAACCAA  
lbk146.3 ~AACAGTGCACAACAGTGGG--CA--TT--TG--A-G---CGGTGGCTTAACCAA  
lbk146.4 ~AACAGTGCACAACAGTGGG--CA--TT--TG--A-G---CGGTGGCTTAACCAA  
lbk146.5 ~AACAGTGCACAACAGTGGG--CA--TT--TG--A-G---CGGTGGCTTAACCAA  
lbk147.1\* ~AACAGTGCACAACAGTGGG--CA--TT--TG--A-G---CGGTGGCTTAACCAA  
lbk148.2 ~AACAGTGCACAACAGTGGG--CA--TT--TG--A-G---CGGTGGCTTAACCAA  
lbk149.1 ~AACAGTGCACAACAGTGGG--CA--TT--TG--A-G---GGTGGCTTAACCAA [3, +13]  
lbk149.2 ~AACAGTGCACAACAGTGGG--CA--TT--TG--A-G---CGGTGGCTTAACCAA  
lbk149.3 ~AACAGTGCACAACAGTGGG--CA--TT--TG--A-G---GGTGGCTTAACCAA [-5]  
lbk150.1 ~AACAGTGCACAACAGTGGG--CA--TT--TG--A-G---GGCTTAACCAA [-7]  
lbk150.2 ~AACAGTGCACAACAGTGGG--CA--TT--TG--A-G---GGCTTAACCAA [-7]  
lbk150.4 ~AACAGTGCACAACAGTGGG--CA--TT--TG--A-G---GGCTTAACCAA [-7]  
lbk151.1 ~AACAGTGCACAACAGTGGG--CA--TT--TG--A-G---CGGTGGCTTAACCAA  
lbk151.2 ~AACAGTGCACAACAGTGGG--CA--TT--TG--A-G---CGGTGGCTTAACCAA [-1]

## E

```
wild type ~ACTGGGGGATCCCCTGAGTGCTCTACTCAAATCCGGTGGCG
lbk85.1* ~ACTGGGGGATCCCCCTGAGTGCTCTACTCAAATCCGGTGGCG
lbk85.2 ~ACTGGGGGATCCCCCTGAGTGCTCTACTCAAATCCGGTGGCG
lbk85.3 ~ACTGGGGGATCCCCCTGAGTGCTCTACTCAAATCCGGTGGCG
lbk85.4 ~ACTGGGGGATCCCCCTGAGTGCTCTACTCAAATCCGGTGGCG
lbk85.5 ~ACTGGGGGATCCCCCTGAGTGCTCTACTCAAATCCGGTGGCG
lbk85.6 ~ACTGGGGGATCCCCCTGAGTGCTCTACTCAAATCCGGTGGCG
lbk92.1 ~ACTGGGGGATCCCCCTGAGTGCTCTACTCAAATCCGGTGGCG
lbk92.2 ~ACTGGGGGATCCCCCTGAGTGCTCTACTCAAATCCGGTGGCG
lbk92.3 ~ACTGGGGGATCCCCCTGAGTGCTCTACTCAAATCCGGTGGCG
lbk92.4 ~ACTGGGGGATCCCCCTGAGTGCTCTACTCAAATCCGGTGGCG
lbk92.5 ~ACTGGGGGATCCCCCTGAGTGCTCTACTCAAATCCGGTGGCG
lbk92.6 ~ACTGGGGGATCCCCCTGAGTGCTCTACTCAAATCCGGTGGCG
lbk103.1 ~ACTGGGGGATCCCCCTGAGTGCTCTACTCAAATCCGGTGGCG
lbk103.2 ~ACTGGGGGATCCCCCTGAGTGCTCTACTCAAATCCGGTGGCG
lbk103.3 ~ACTGGGGGATCCCCCTGAGTGCTCTACTCAAATCCGGTGGCG
lbk103.4 ~ACTGGGGGATCCCCCTGAGTGCTCTACTCAAATCCGGTGGCG
lbk103.5 ~ACTGGGGGATCCCCCTGAGTGCTCTACTCAAATCCGGTGGCG
lbk103.6 ~ACTGGGGGATCCCCCTGAGTGCTCTACTCAAATCCGGTGGCG
lbk131.1 ~ACTGGGGGATCCCCCTGAGTGCTCTACTCAAATCCGGTGGCG
lbk131.2 ~ACTGGGGGATCCCCCTGAGTGCTCTACTCAAATCCGGTGGCG
lbk131.3 ~ACTGGGGGATCCCCCTGAGTGCTCTACTCAAATCCGGTGGCG
lbk131.4 ~ACTGGGGGATCCCCCTGAGTGCTCTACTCAAATCCGGTGGCG
lbk131.5 ~ACTGGGGGATCCCCCTGAGTGCTCTACTCAAATCCGGTGGCG
lbk131.6 ~ACTGGGGGATCCCCCTGAGTGCTCTACTCAAATCCGGTGGCG
```

## F

```
wild type ~CAACAGTGCACAACAGTGGACATTTGAGCGGTGGCTTAACCAA
lbk85.1* ~CAACAGTGCACAACAGTGGACATTTGAGCGGTGGCTTAACCAA
lbk85.2 ~CAACAGTGCACAACAGTGGACATTTGAGCGGTGGCTTAACCAA
lbk85.3 ~CAACAGTGCACAACAGTGGACATTTGAGCGGTGGCTTAACCAA
lbk85.4 ~CAACAGTGCACAACAGTGGACATTTGAGCGGTGGCTTAACCAA
lbk85.5 ~CAACAGTGCACAACAGTGGACATTTGAGCGGTGGCTTAACCAA
lbk85.6 ~CAACAGTGCACAACAGTGGACATTTGAGCGGTGGCTTAACCAA
lbk92.1 ~CAACAGTGCACAACAGTGGACATTTGAGCGGTGGCTTAACCAA
lbk92.2 ~CAACAGTGCACAACAGTGGACATTTGAGCGGTGGCTTAACCAA
lbk92.3 ~CAACAGTGCACAACAGTGGACATTTGAGCGGTGGCTTAACCAA
lbk92.4 ~CAACAGTGCACAACAGTGGACATTTGAGCGGTGGCTTAACCAA
lbk92.5 ~CAACAGTGCACAACAGTGGACATTTGAGCGGTGGCTTAACCAA
lbk92.6 ~CAACAGTGCACAACAGTGGACATTTGAGCGGTGGCTTAACCAA
lbk103.1 ~CAACAGTGCACAACAGTGGACATTTGAGCGGTGGCTTAACCAA
lbk103.2 ~CAACAGTGCACAACAGTGGACATTTGAGCGGTGGCTTAACCAA
lbk103.3 ~CAACAGTGCACAACAGTGGACATTTGAGCGGTGGCTTAACCAA
lbk103.4 ~CAACAGTGCACAACAGTGGACATTTGAGCGGTGGCTTAACCAA
lbk103.5 ~CAACAGTGCACAACAGTGGACATTTGAGCGGTGGCTTAACCAA
lbk103.6 ~CAACAGTGCACAACAGTGGACATTTGAGCGGTGGCTTAACCAA
lbk131.1 ~CAACAGTGCACAACAGTGGACATTTGAGCGGTGGCTTAACCAA
lbk131.2 ~CAACAGTGCACAACAGTGGACATTTGAGCGGTGGCTTAACCAA
lbk131.3 ~CAACAGTGCACAACAGTGGACATTTGAGCGGTGGCTTAACCAA
lbk131.4 ~CAACAGTGCACAACAGTGGACATTTGAGCGGTGGCTTAACCAA
lbk131.5 ~CAACAGTGCACAACAGTGGACATTTGAGCGGTGGCTTAACCAA
lbk131.6 ~CAACAGTGCACAACAGTGGACATTTGAGCGGTGGCTTAACCAA
```

**Figure S2: CRISPR-induced mutations in *lbk*.** Sequence alignments of genomic regions *lbk*-1 and *lbk*-2 in wild type (transgenic nos-Cas9) and all balanced lines tested. The PAM sequence is highlighted. Number of base pairs deleted [-#], inserted [+ #] and substituted [#] are indicated in

brackets and highlighted in red. No numbers in brackets indicate wild-type sequence. Wild-type genomic regions lbk-1 and lbk-2 are underlined. The stop codon is shown in red text. **(A)** lbk-1 and **(B)** lbk-2 sequence alignments in jackpot lines, or broods with >50% e. **(C)** lbk-1 and **(D)** lbk-2 sequence alignments in broods with 1-50% e. **(E)** lbk-1 and **(F)** lbk-2 sequence alignments in broods with no e. Homozygous lethal lines are indicated by \*.
